# Supplementary material for: MicroRNAs Are Mediators of Androgen Action in Prostate and Muscle
Source: PubMed Central journal article supplement (PMC2965097; doi:10.1371/journal.pone.0013637), 2010-10-27
Supplement: pone.0013637.s002.pdf [file pone.0013637.s002.pdf]

**Table S2**

| SARM-1     |          | SARM-2     |          | DHT        |          | Intact     |          |
|------------|----------|------------|----------|------------|----------|------------|----------|
| miR        | P value  | miR        | P value  | miR        | P value  | miR        | P value  |
| Let-7b     | 0.012    | Let-7c     | 0.069    | Let-7g     | 0.025    | Let-7b     | 5.78E-06 |
| Let-7c     | 0.003    | Let-7g     | 6.57E-04 | mir-016    | 1.35E-06 | Let-7c     | 1.97E-05 |
| Let-7g     | 6.19E-04 | Let-7i     | 0.012    | mir-021    | 0.002    | Let-7g     | 9.34E-06 |
| Let-7i     | 0.003    | mir-10a    | 0.037    | mir-024    | 1.88E-04 | Let-7i     | 7.51E-05 |
| mir-009*   | 0.012    | Mir-15b    | 0.005    | mir-026a   | 1.01E-04 | mir-009    | 1.45E-04 |
| mir-010a   | 0.003    | mir-16     | 2.16E-05 | mir-30a-3p | 1.74E-08 | mir-10a    | 3.87E-05 |
| mir-15b    | 8.58E-05 | mir-19b    | 0.017    | mir-30a-5p | 0.018    | mir-15b    | 1.97E-07 |
| mir-16     | 0.015    | mir-21     | 0.001    | mir-30b    | 0.021    | mir-17-5p  | 1.90E-05 |
| mir-19a    | 0.029    | mir-24     | 0.004    | mir-125a   | 6.09E-04 | mir-19a    | 3.22E-05 |
| mir-19b    | 0.001    | mir-26a    | 0.0133   | mir-126    | 0.001    | mir-19b    | 1.62E-05 |
| mir-20a    | 0.013    | mir-30a-3p | 5.88E-07 | mir-133b   | 0.001    | mir-20a    | 2.58E-05 |
| mir-21     | 0.002    | mir-30b    | 5.89E-04 | mir-141    | 6.29E-05 | mir-21     | 4.82E-07 |
| mir-26b    | 0.002    | mir-30c    | 0.004    | mir-146a   | 1.01E-06 | mir-23b    | 0.014    |
| mir-27a    | 9.08E-05 | mir-100    | 0.005    | mir-146b   | 6.11E-08 | mir-25     | 0.001    |
| mir-29a    | 0.013    | mir-106b   | 0.033    | mir-148a   | 2.44E-06 | mir-26b    | 0.001    |
| Mir-29c    | 0.007    | mir-125a   | 0.037    | mir-148b   | 0.015    | mir-27a    | 0.024    |
| mir-30a-3p | 0.011    | mir-126    | 0.048    | mir-150    | 4.24E-07 | mir-27b    | 0.021    |
| mir-30a-5p | 6.59E-05 | mir-133b   | 3.29E-10 | mir-152    | 9.05E-06 | mir-29a    | 3.22E-06 |
| mir-30b    | 5.04E-05 | mir-141    | 3.21E-06 | mir-181b   | 8.49E-05 | mir-29c    | 8.73E-04 |
| mir-30c    | 0.012    | mir-146a   | 6.23E-06 | mir-186    | 0.011    | mir-30a-3p | 0.0083   |
| mir-30d    | 0.045    | mir-146b   | 5.06E-08 | mir-191    | 9.28E-11 | mir-30a-5p | 0.0012   |
| mir-30e-5p | 0.018    | mir-148a   | 3.70E-06 | mir-195    | 0.011    | mir-30b    | 1.52E-07 |
| mir-92     | 2.73E-05 | mir-150    | 1.28E-09 | mir-196a   | 2.75E-04 | mir-30c    | 1.32E-05 |
| mir-98     | 0.003    | mir-152    | 2.32E-04 | mir-196b   | 4.24E-04 | mir-30d    | 8.97E-05 |
| mir-100    | 0.019    | mir-181b   | 0.004    | mir-199a   | 0.009    | mir-30e-5p | 7.28E-04 |
| mir-101    | 0.026    | mir-188    | 0.036    | mir-200a   | 3.22E-04 | mir-92     | 0.04     |
| mir-106b   | 0.039    | mir-191    | 3.88E-11 | mir-200c   | 0.004    | mir-98     | 7.14E-04 |
| mir-130a   | 0.021    | mir-200a   | 2.04E-05 | mir-214    | 0.002    | mir-99b    | 2.25E-04 |
| mir-133b   | 1.49E-05 | mir-200c   | 1.64E-04 | mir-218    | 1E-05    | mir-100    | 7.04E-07 |
| mir-141    | 0.029    | mir-214    | 0.019    | mir-222    | 0.037    | mir-101    | 0.007    |
| mir-145    | 0.033    | mir-218    | 1.56E-05 | mir-223    | 3.94E-08 | mir-103    | 0.009    |
| mir-146a   | 0.008    | mir-223    | 3.15E-05 | mir-320    | 3.61E-05 | mir-106b   | 0.001    |
| mir-146b   | 6.68E-06 | mir-301    | 0.017    | mir-331    | 0.016    | mir-125b   | 1.23E-04 |
| mir-148a   | 3.43E-04 | mir-320    | 8.18E-05 | mir-339    | 0.023    | mir-130a   | 0.004    |
| mir-149    | 9.75E-06 | mir-342    | 0.011    | mir-342    | 0.003    | mir-133a   | 0.002    |
| mir-150    | 1.42E-04 | mir-375    | 0.004    | mir-375    | 0.019    | mir-133b   | 7.15E-08 |
| mir-152    | 0.017    | mir-423    | 6.52E-06 | mir-423    | 3.33E-04 | mir-135a   | 0.035    |

**Table S2 (Cont...)**

| SARM-1   |          | SARM-2     |          | DHT        |          | Intact     |          |
|----------|----------|------------|----------|------------|----------|------------|----------|
| miR      | P value  | miR        | P value  | miR        | P value  | miR        | P value  |
| Mir-181b | 0.032    | mir-484    | 8.28E-05 | mir-484    | 0.005    | mir-141    | 9.11E-08 |
| Mir-182  | 0.017    | mir-10b    | 0.03     | mir-10b    | 2.67E-04 | mir-142-5p | 0.006    |
| Mir-183  | 0.018    | mir-031    | 4.58E-04 | mir-31     | 8.28E-07 | mir-143    | 0.005    |
| Mir-186  | 0.006    | mir-093    | 2.16E-04 | mir-93     | 0.003    | mir-145    | 6.06E-06 |
| Mir-191  | 1.89E-05 | mir-124a   | 6.05E-05 | mir-99a    | 0.033    | mir-146a   | 0.002    |
| Mir-200a | 2.24E-04 | mir-140    | 2.82E-05 | mir-106a   | 2.79E-04 | mir-146b   | 1.32E-05 |
| Mir-200c | 7.56E-06 | mir-151    | 4.95E-04 | mir-124a   | 5.76E-06 | mir-148a   | 1.94E-08 |
| Mir-222  | 0.037    | mir-155    | 9.96E-07 | mir-140    | 2.61E-05 | mir-148b   | 2.22E-05 |
| Mir-223  | 4.81E-04 | mir-204    | 0.004    | mir-151    | 6.50E-06 | mir-149    | 2.57E-04 |
| Mir-301  | 3.50E-04 | mir-221    | 3.85E-05 | mir-155    | 7.12E-05 | mir-150    | 2.40E-06 |
| Mir-320  | 0.049    | mir-324-5p | 0.007    | mir-199b   | 0.041    | mir-152    | 0.003    |
| Mir-328  | 0.037    | mir-374-5p | 0.001    | mir-204    | 7.05E-04 | mir-183    | 6.20E-06 |
| Mir-365  | 6.08E-04 | mir-467b   | 1.11E-05 | mir-374-5p | 2.14E-06 | mir-188    | 3.86E-06 |
| Mir-375  | 8.27E-04 | mir-497    | 0.015    | mir-424    | 0.028    | mir-191    | 1.49E-06 |
| Mir-378  | 0.02     | mir-678    | 6.32E-05 | mir-467b   | 4.91E-05 | mir-199a   | 6.11E-05 |
| Mir-422b | 0.002    | mir-682    | 0.020    | mir-542-5p | 0.027    | mir-200a   | 9.42E-09 |
| Mir-423  | 1.29E-05 | mir-690    | 6.09E-06 | mir-678    | 0.002    | mir-200b   | 2.47E-04 |
| Mir-484  | 1.91E-04 | mir-692    | 0.005    | mir-682    | 7.57E-04 | mir-200c   | 6.41E-07 |
| Mir-009  | 7.66E-04 | mir-706    | 4.84E-04 | mir-690    | 1.92E-05 | mir-222    | 0.024    |
| Mir-30e* | 0.004    | mir-709    | 1.32E-04 | mir-706    | 0.003    | mir-223    | 0.005    |
| Mir-093  | 8.64E-04 |            |          | mir-709    | 0.007    | mir-301    | 5.35E-05 |
| Mir-124a | 4.90E-05 |            |          | mir-720    | 0.011    | mir-320    | 0.024    |
| Mir-140  | 0.003    |            |          |            |          | mir-328    | 0.003    |
| Mir-155  | 1.17E-05 |            |          |            |          | mir-339    | 0.021    |
| Mir-199b | 9.99E-04 |            |          |            |          | mir-340    | 1.45E-05 |
| Mir-204  | 0.029    |            |          |            |          | mir-365    | 9.00E-06 |
| Mir-221  | 5.42E-05 |            |          |            |          | mir-375    | 0.002    |
| Mir-424  | 0.032    |            |          |            |          | mir-378    | 3.60E-04 |
| Mir-467b | 2.51E-05 |            |          |            |          | mir-422b   | 2.73E-04 |
| Mir-497  | 9.54E-04 |            |          |            |          | mir-423    | 1.80E-09 |
| Mir-678  | 0.020    |            |          |            |          | mir-009    | 3.82E-05 |
| Mir-680  | 0.0159   |            |          |            |          | mir-093    | 1.29E-07 |
| Mir-682  | 7.14E-05 |            |          |            |          | mir-099a   | 6.12E-05 |
| Mir-690  | 1.18E-04 |            |          |            |          | mir-124a   | 0.001    |
|          |          |            |          |            |          | mir-127    | 1.96E-04 |
|          |          |            |          |            |          | mir-140    | 0.004    |
|          |          |            |          |            |          | mir-142-3p | 6.17E-04 |

**Table S2 (Cont...)**

| SARM-1 |         | SARM-2 |         | DHT |         | Intact     |              |
|--------|---------|--------|---------|-----|---------|------------|--------------|
| miR    | P value | miR    | P value | miR | P value | miR        | P value      |
|        |         |        |         |     |         | mir-155    | <b>0.003</b> |
|        |         |        |         |     |         | mir-192    | 0.012        |
|        |         |        |         |     |         | mir-199b   | 0.05         |
|        |         |        |         |     |         | mir-204    | 0.003        |
|        |         |        |         |     |         | mir-221    | 1.03E-07     |
|        |         |        |         |     |         | mir-324-5p | 1.55E-04     |
|        |         |        |         |     |         | mir-379    | 0.004        |
|        |         |        |         |     |         | mir-424    | 2.43E-04     |
|        |         |        |         |     |         | mir-429    | 2.82E-06     |
|        |         |        |         |     |         | mir-467b   | 1.29E-06     |
|        |         |        |         |     |         | mir-487b   | 1.87E-04     |
|        |         |        |         |     |         | mir-491    | 1.94E-04     |
|        |         |        |         |     |         | mir-497    | 4.75E-05     |
|        |         |        |         |     |         | mir-678    | 2.83E-07     |
|        |         |        |         |     |         | mir-680    | 1.23E-05     |
|        |         |        |         |     |         | mir-690    | 3.75E-06     |
|        |         |        |         |     |         | mir-692    | 2.16E-08     |
|        |         |        |         |     |         | mir-694    | 3.80E-09     |
|        |         |        |         |     |         | mir-706    | 3.60E-06     |
|        |         |        |         |     |         | mir-709    | 2.10E-04     |
|        |         |        |         |     |         | mir-721    | 0.009        |
